1 **Habitat structure drives the evolution of aerial displays in birds**

2

3 João C. T. Menezes<sup>1,2\*</sup> & Eduardo S. A. Santos<sup>1,2</sup>

4

5 *<sup>1</sup>Programa de Pós-graduação em Ecologia, Universidade de São Paulo, 05508-090, São Paulo,*

6 *Brazil*

7 *<sup>2</sup>BECO do Departamento de Zoologia, Universidade de São Paulo, 05508-090, São Paulo,*

8 *Brazil*

9 *\*Corresponding author: jocateme@gmail.com*

10

11 **Physical properties of the environment may shape signalling traits by determining**

12 **how effective the signals are in affecting the behaviour of other individuals.**

13 **Evidence abounds of signalling environment driving the evolution of colours and**

14 **sounds, but little is known about its influence upon gestural displays. Here, we**

15 **performed a continent-wide phylogenetic comparative analysis to test the**

16 **hypothesis that habitat structure drives the evolution of aerial sexual displays in**

17 **passerine birds. We found that aerial displays are seven times more likely to evolve**

18 **in open habitats than in forests, likely as a result of physical properties that allow**

19 **aerial displays to transmit more broadly in open habitats. Our results provide an**

20 **emblematic example of how environmental factors may help predict the direction of**

21 **evolution of otherwise unpredictable sexual traits. The broader range of aerial**

22 **displays in open habitats may also mean that females can sample more males,**

23 **potentially leading to more intense sexual selection over open-habitat, aerial-**

24 **displaying males.**

25

26 Communication in animals occurs through the emission and reception of signals –  
27 acts or structures that, by definition, have been selected because they affect the  
28 behaviour of other organisms<sup>1,2</sup>. How effectively a particular trait affects the behaviour  
29 of another organism, however, depends upon the physical properties of the  
30 environment through which the signal is transmitted<sup>3</sup>. For instance, females of three-  
31 spined sticklebacks (*Gastosteus aculeatus*) prefer mates that have a brighter-red  
32 coloration<sup>4</sup>. Red coloration in males, thus, is a signal: it has been selected because it  
33 affects how females choose a mate. However, under green artificial light, red coloration  
34 is not transmitted as effectively and thus females show no preference<sup>4</sup>. If a hypothetical  
35 population of sticklebacks had lived under green lighting conditions all along their  
36 evolutionary time, red coloration would most likely not be selected as a signal of male  
37 quality. Such influence of environmental properties upon both ends of communication  
38 systems – signalling trait and sensory tuning to receive it – is the key feature  
39 underlying the sensory drive hypothesis<sup>3,5,6</sup>. As a consequence, we can expect the same  
40 characteristic to be positively selected in some environments, but not in others.  
41 Accordingly, the structure of many signals has been found to be habitat-dependent in  
42 animals that use colours, sounds, ornaments or vibration to communicate (reviewed in  
43 <sup>3,7</sup>). However, empirical evidence of sensory drive upon gestural (motion-based)  
44 signals (henceforth, displays) is mostly restricted to individuals adjusting their  
45 behaviour to maximize the conspicuousness of the display – for example, by choosing  
46 an appropriate signalling site or timing<sup>8-13</sup>.

47 Various animals, from jellyfishes<sup>14</sup> and arthropods<sup>15-17</sup> to aquatic and terrestrial  
48 vertebrates<sup>18-24</sup>, use gestural displays as sexual signals. These displays are selected  
49 through intersexual mate choice or intrasexual competition mechanisms<sup>25,26</sup> and may,  
50 as any signal, be subject to selective pressures imposed by the signalling environment.  
51 Only recently, however, have researchers begun to look into the potential influence of

52 the environment upon the structure of displays – rather than the choice of timing or  
53 site –, with two studies finding evidence of it<sup>27,28</sup>. Thus, we currently have tentative  
54 knowledge about the influence of the signalling environment on the evolution of  
55 gestural displays.

56 Sexual displays performed by passerine birds come in all forms: from the  
57 simple, static ‘bill-up’ posture of silver-beaked tanagers (Isler & Isler 1987 *in* <sup>29</sup>) to the  
58 most complex, skilful dances performed by manakins<sup>30</sup> and birds-of-paradise<sup>28</sup>.  
59 Passerines also exhibit high variability in habitat preferences, having colonized  
60 environments as diverse as Arctic tundras, tropical rainforests and arid deserts<sup>31</sup>. These  
61 features make Passeriformes a promising group to investigate the potential role of  
62 environment in shaping displays. As we will argue, a particular component present on  
63 many of the sexual displays exhibited by passerines – the flight component of aerial  
64 displays – seems particularly likely to evolve under sensory drive. For example, flying  
65 above an open habitat (*vis-à-vis* underneath the forest canopy) during the display puts  
66 the signaller under more intense light<sup>32</sup>, and, as a consequence, the signal reaches a  
67 wider range of potential receivers, all else held constant<sup>33</sup>. Moreover, flying above an  
68 open habitat may result in less or no vegetation obstructing the signaller from the  
69 perspective of potential receivers. Flying inside the forest does not reduce visual  
70 obstacles between signaller and receivers and, in addition, the display is less likely to  
71 be perceived the farther signaller and receiver are because vegetation accumulates  
72 horizontally. Lastly, complex visual backgrounds make signals less consistently  
73 perceived<sup>9</sup>. The sky is as uniform as a background may be, while forest interior is a  
74 highly heterogeneous one.

75 Thus, although females may assess motor performance of males from a short  
76 distance in both habitats<sup>26</sup>, it is unlikely that aerial displays offer any advantage in a  
77 broader spatial scale in forests. In open habitats, a flight component may allow the

78 display reach a broad range of potential receivers with more intensity, less visual  
79 obstruction, and more consistency. Here, we evaluated whether sensory drive  
80 influences the evolution of sexual displays by testing the hypothesis that aerial  
81 displays are more likely to evolve in passerine birds that inhabit open habitats than in  
82 those that inhabit forests. We did that by performing a continent-wide phylogenetic  
83 analysis of 469 species, which constitutes the most comprehensive test of sensory drive  
84 – phylogenetically and geographically – as far as we are aware. If our findings  
85 support this hypothesis, we would provide evidence to corroborate, for the first time,  
86 the pattern predicted for decades by researchers<sup>34–36</sup>, but never actually tested, that  
87 aerial-displaying species are more prevalent in open habitats than in forests.

## 88 **Results**

89 We were able to collect data about sexual display and primary habitat structure for 469  
90 (19.2%) species of New World passerines belonging to 41 families (Supplementary  
91 Data); the remaining species – for which data was not available – were excluded  
92 from analyses. Each species was classified as to the *presence* (1) or *absence* (0) of aerial  
93 sexual display, and as living primarily in *open habitats* (1) or *forests* (0). Among open-  
94 habitat passerines, 127 of 188 species (68%) were aerial displayers, whereas 48% ( $N =$   
95 134) of the 281 forest species exhibited aerial display (Figure 1). Although this pattern  
96 is consistent with the common perception that aerial-displaying passerines are more  
97 prevalent in open habitats, it allows no inference as to whether habitat influences the  
98 evolution of aerial display.

99

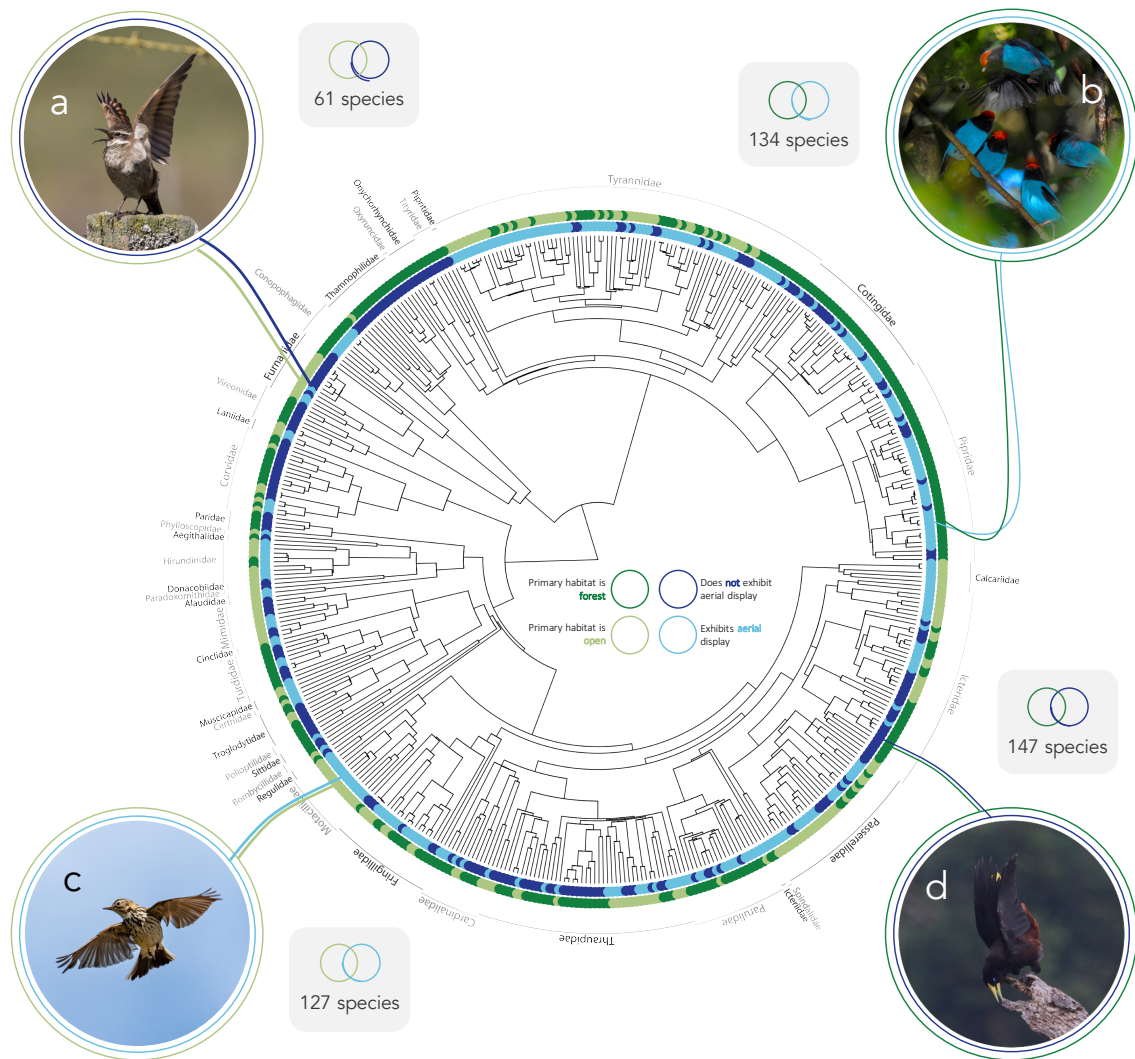

100

101 **Figure 1.** Phylogenetic distribution of display and habitat structure data (inner and  
 102 outer circle, respectively), number of species (grey boxes) and examples of species in  
 103 each category: (a) stout-billed cinclodes (*Cinclodes excelsior*) exhibit non-aerial display  
 104 in open habitats (photo courtesy of Ken Chamberlain), (b) blue manakins (*Chiroxiphia*  
 105 *caudata*) exhibit aerial display in forests (photo courtesy of João Quental), (c) meadow  
 106 pipits (*Anthus pratensis*) exhibit aerial display in open habitats (photo courtesy of Kevin  
 107 Hay), and (d) crested oropendolas (*Psarocolius decumanus*) exhibit non-aerial display in  
 108 forests (photo by Gregory Smith, CC BY-SA 2.0). For the ancestral state estimation, see  
 109 Figure S1.

110

111 To test the hypothesis that aerial displays are more likely to evolve in open-  
112 habitat passerines than forest ones, we conducted two different phylogenetic  
113 comparative analyses using species-level Passeriformes trees<sup>37</sup>. In the first analysis, we  
114 fitted phylogenetic logistic regression models (PLogReg<sup>38</sup>) to determine whether  
115 habitat structure influences the probability that a species exhibits aerial display, while  
116 accounting for phylogenetic dependence among species. We compared a null model  
117 (with no predictor variable) with one in which habitat structure was fit as a categorical  
118 predictor, and accounted for phylogenetic uncertainty by running each model with a  
119 sample of 1,000 topologies, and performed model choice using the Akaike information  
120 criterion (AIC). The model containing habitat structure as a predictor was selected in  
121 all of the 1,000 iterations, with a mean  $\Delta$ AIC of 17.56 (min = 6.11, max = 46.23). Mean  
122 slope estimate for open habitat was 0.489 (95% CI: 0.485 to 0.492), with a mean  $p$ -value  
123 of 0.025 ( $\leq 0.05$  in 92.8% of iterations). This indicates that the probability that a  
124 passerine species exhibits an aerial sexual display is greater in open habitats than in  
125 forests. Performing this analysis with a Bayesian (MCMC) approach yielded  
126 qualitatively similar results (see Supplementary Results). We performed an additional  
127 PLogReg to test whether forest stratum influences the probability that forest passerines  
128 exhibit aerial display, but found no clear effect (see Supplementary Results). This result  
129 does not support the idea that canopy stratum acts in a similar way as open habitats in  
130 terms of signal transmission properties.

131 Secondly, we fitted a series of Markov models<sup>39,40</sup> to test for correlated  
132 evolution between aerial display and habitat structure using the same set of species  
133 and trees. We designed four biologically plausible models: a) independent (habitat  
134 transitions not depending on aerial display state and vice-versa), b) correlated (each  
135 variable depending on the other), c) habitat-dependent (aerial display transitions  
136 depending on habitat state), and d) display-dependent (habitat transitions depending

137 on aerial display state). We fitted each model using maximum-likelihood estimates and  
138 extracted their AIC value. We predicted that the habitat-dependent model would be  
139 the best in the model set to explain our data, as habitat should influence the probability  
140 of gaining or losing aerial display, but exhibiting or not aerial displays should not  
141 influence transitions between habitats. Indeed, the habitat-dependent model had the  
142 lowest AIC in 98.3% of the trees (max.  $\Delta\text{AIC} = 1.50$ ; Figure S2). However, the weight of  
143 evidence in its favour was not unequivocal<sup>41</sup> (*i.e.*, Akaike weight,  $w_i \leq 0.90$ ) in 92.5% of  
144 the trees (median = 0.84; range = 0.32 to 1.00), with the correlated model having a  
145 weight of evidence as high as 0.68 (median = 0.15; Figure S3). For this reason, and to  
146 avoid having to use subjective  $\Delta\text{AIC}$  thresholds to select a single best model, we  
147 decided to perform model averaging of the estimates. We did that by weighting the  
148 transition rates estimated in each of the four models by the model's Akaike weight,  
149 resulting in a single model-averaged estimate of each transition rate per tree (Figure  
150 S4). We then evaluated these transition rate estimates to evaluate whether gains of  
151 aerial display are more likely in open habitats than in forests. Across the 1,000 trees, we  
152 found that transition rates to aerial displays are  $7.03 \pm 1.28$  (median  $\pm$  SD) times more  
153 likely in open habitats than in forests, as predicted by our hypothesis (Figures 2, S5).  
154

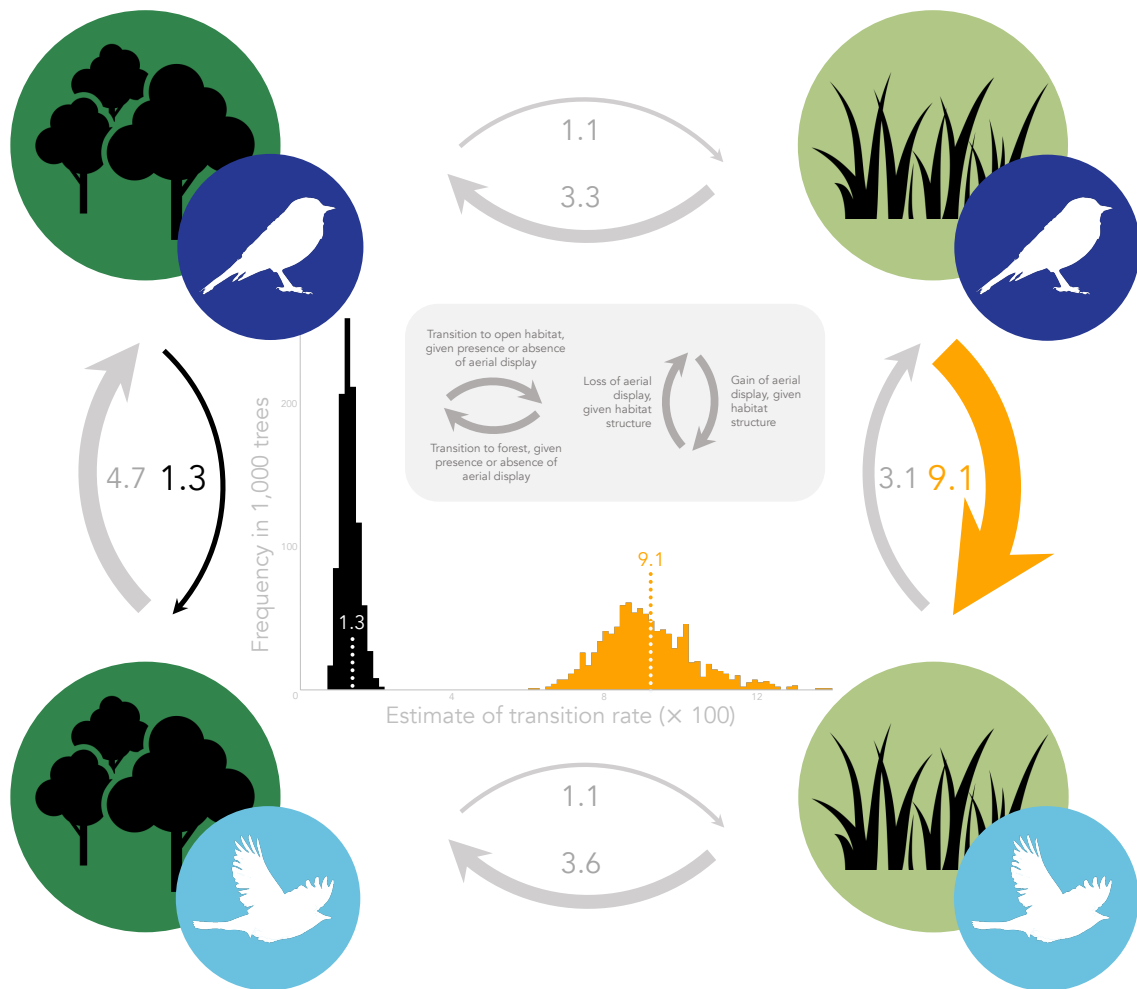

155

156 **Figure 2.** Evolutionary transition rates between habitat structure and aerial display.

157 Arrows are weighted by the values beside them, which indicate the median ( $\times 10^2$ )

158 model-averaged maximum-likelihood estimate of each rate across 1,000 different trees.

159 Median transition rates to aerial displays are approximately seven times higher in open

160 habitats (orange arrow) than in forests (black arrow; see Figure S5 for the distribution

161 of orange rate to black rate ratios). In the centre, distribution of estimates of the two

162 rates of interest across the 1,000 trees (see Figure S4 for the distribution of estimates of

163 all transition rates).

## 164 Discussion

165 Our findings support the hypothesis that aerial displays are more likely to evolve in

166 open-habitat passerines than forest ones. This macroevolutionary pattern is likely the



167 result of physical properties of the environment that allow aerial displays to transmit  
168 more broadly and effectively in open habitats than forests. Therefore, our order-level  
169 analysis of 469 species provides the most comprehensive evidence of sensory drive  
170 acting on signal evolution to date, as far as we are aware. It is also the first  
171 phylogenetic analysis to find evidence of habitat shaping the evolution of gestural  
172 displays. Previous studies had recognized the role of habitat structure in shaping  
173 sound-, colour- and ornament-based signals in lizards and birds<sup>42-47</sup>, but failed to  
174 detect an influence of habitat on the structure of motion-based signals (*e.g.*, in fiddler  
175 crabs<sup>16</sup>). More than seven decades after Armstrong's<sup>34</sup> (p. 247) remark that "high-flying  
176 [...] displays are most characteristic of birds of the open country", we offer compelling  
177 evidence of the evolutionary process that likely underlies this pattern. Armstrong then  
178 goes on to state that the "prime consideration [of display-flights] is to attract the  
179 attention of the immigrant females". Indeed, all displays analysed in our study  
180 likewise have a sexual function. Therefore, the fact that these are sexual displays allows  
181 us to discuss how our findings about sensory drive may interact with sexual selection,  
182 particularly regarding its direction and intensity.

183       Classical sexual selection models such as Fisherian runaway<sup>48-50</sup> and  
184 handicap<sup>51,52</sup> offer little prediction about which sexual traits should evolve and to what  
185 direction<sup>53</sup>. The handicap model, for instance, predicts how costly a signal should be,  
186 but not how these costs should be expressed<sup>54</sup>. The Fisherian runaway process assumes  
187 an arbitrary direction of evolution altogether<sup>55,56</sup>. Passerine gestural displays may seem  
188 particularly unpredictable, with multiple, clade-specific evolutionary forces acting on  
189 their evolution<sup>28,57,58</sup>. Yet, here we show that a simple ecological factor, habitat  
190 structure, predicts to a great degree the presence of a major gestural component. In the  
191 paper introducing the sensory drive hypothesis, Endler<sup>5</sup> highlighted an important  
192 aspect of sensory drive: that it allows us to predict which specific sexual traits should

193 evolve as signals and to what direction. Our findings provide an emblematic example  
194 of how the signalling environment may help predict the direction of evolution of  
195 sexual signals.

196 Our system also allows us to explore the interplay between sensory drive and  
197 sexual selection from a different perspective. The effectiveness of aerial displays is  
198 influenced by the habitat because the signal can reach a broader range in open habitats  
199 than in forests. For males, this means that a male performing aerial display is able  
200 reach a higher number of females in open habitats than in forests. From the female  
201 perspective, it means that females are able to assess more males per unit of time in  
202 open, unobstructed habitats, thus increasing the number of potential mates they can  
203 sample during the mate choice process. Recent comparative and simulation data show  
204 that when females can sample more males during mate choice, sexual selection is  
205 stronger and, consequently, male ornaments are expected to be more extreme<sup>59</sup>. Thus,  
206 besides driving the evolution of aerial displays through sensory drive, we suggest that  
207 open habitats may intensify sexual selection on male aerial displayers by enabling  
208 females to sample more males in the population.

## 209 **Methods**

### 210 *Study group*

211 Passeriformes is, by far, the most speciose order of birds, encompassing 5,966 species<sup>37</sup>  
212 that show a diverse array of sexual behaviours and habitat-selection strategies<sup>31</sup>. Such  
213 diversity, and the fact that Passeriformes have well-sampled phylogenies<sup>37</sup>, make them  
214 an appropriate group for the purposes of this study. We searched for information on  
215 all extant species that regularly breed in the New World, excluding oceanic-island  
216 endemics (*e.g.*, Hawaii, Galápagos and Juan Fernández). According to the American  
217 Ornithologists' Union<sup>60-62</sup>, 2,393 species meet these criteria, but an additional 49 species

218 are recognized by Jetz et al.<sup>37</sup>, totalling 2,442 targeted species (Supplementary Data).  
219 For each species, we answered the following questions, which brought forth the three  
220 binary variables used in the analyses: (i) do individuals perform aerial display?; (ii) do  
221 individuals occupy primarily open or forest habitats?; and, in the case of forest species,  
222 (iii) do individuals forage exclusively in canopy stratum? Each of these variables will  
223 be detailed below.

224

### 225 *Display data*

226 We collected display data from a variety of sources: life-history databases (*Handbook of*  
227 *the Birds of the World Alive*<sup>31</sup>, accessed 19 December 2016–10 March 2018; Cornell Lab of  
228 Ornithology's *Neotropical Birds Online*<sup>29</sup>, accessed 21 August 2017–10 March 2018),  
229 natural-history books (A. C. Bent's *Life histories of North American birds* series<sup>63-72</sup>; A. F.  
230 Skutch's *Life histories of Central American birds*<sup>73-75</sup>; A. Wetmore's *The birds of the republic*  
231 *of Panama*<sup>76,77</sup>; H. Sick's *Ornitologia brasileira*<sup>35</sup>), an online media database (HBW's  
232 *Internet Bird Collection*, <http://hbw.com/ibc>, accessed 4–10 October 2017) and a data  
233 paper<sup>78</sup> (see Supplementary Methods for details).

234 For data collection purposes, we considered sexual display any ritualized,  
235 sexually selected gesture or posture. The question *do individuals perform aerial display?*  
236 was answered *yes* (1) for a species only if any of the data sources claimed that  
237 individuals perform a sexual display that includes a flight component (*i.e.*, an aerial  
238 display). Otherwise, it was answered *no* (0) if any source claimed either (a) that  
239 individuals do not perform aerial sexual display, or (b) that they perform sexual  
240 display that does not include a flight component. Note that, for this question to be  
241 answered – be it with a yes or a no – a sexual display must have been mentioned by  
242 at least one data source (lack of any mention would result in NA). We used a set of  
243 criteria to infer from the available information whether a display is sexual (*i.e.*, sexually

244 selected) and thus relevant for data collection purposes (Table 1). For some species ( $N$   
245 = 29), information was ambiguous about whether the mentioned displays were sexual  
246 (see Table 1 for what we considered ambiguous). We excluded the ambiguous species  
247 from the analyses in the main text, but we also ran a phylogenetic logistic regression  
248 including them to assess whether it would change the results; it did not (see  
249 Supplementary Results).

250 We defined flight component as the flapping of wings while the individual is  
251 not perched. In our conception, aerial displays are only likely to be more effective in  
252 open habitats if the flight is high enough that the bird surpasses the open vegetation. In  
253 spite of that, we decided to adopt an inclusive definition of flight component – one  
254 that includes even flights with little or no vertical gain – because for most species  
255 there was no information about the height of flight during display. This decision is  
256 likely conservative because most of the species with horizontal-flight displays we  
257 know of are forest dwellers (e.g., *Conopophaga*, *Rupicola*, many Pipridae, *Mionectes*,  
258 *Platyrrinchus*). For some species ( $N = 9$ ), we were unable to determine with certainty  
259 whether the sexual display included or not a flight component. This occurred when we  
260 came across ambiguous descriptions such as “occasional jumps/leaps into the air”<sup>78</sup>,  
261 “flitting from twig to twig”<sup>75</sup> (p. 45), and “move restlessly from branch to branch”  
262 (Mitchell 1957 *in* <sup>29</sup>). We dealt with such uncertainty by repeating analyses considering  
263 flight component either absent (main results) or present (Supplementary Results) in the  
264 display; the results were qualitatively similar.

265 Overall, we were able to determine whether 470–499 passerine species  
266 (depending on how strict we were in treating a display as sexual) exhibited aerial  
267 displays or not, which represents 19.2–20.4% of the initial sample set. The remaining  
268 species were classified as NA and thus dropped from the analyses (this same decision  
269 was applied to the other variables as well).

270

271 **Table 1.** Criteria used to infer whether a display described in the literature is sexual  
 272 (*i.e.*, sexually selected) or not. For a display described in a given data source, if the  
 273 available textual information matched any corresponding column below, display was  
 274 considered to be sexual. For instance, for a display described in del Hoyo et al.<sup>31</sup>, IF  
 275 explicit function is sexual, courtship, ... OR section is Breeding OR period of  
 276 occurrence is predominantly during breeding period OR sex of performer or intended  
 277 receiver is specific, THEN display was considered to be sexual. Footnotes refer to  
 278 criteria that indicate that display may or may not be sexual; we repeated analyses  
 279 including or excluding such displays (see Supplementary Results).

| Source                          | Explicit function*                                      | Section                                                 | Period of occurrence                 | Sex of performer or intended receiver                                               |
|---------------------------------|---------------------------------------------------------|---------------------------------------------------------|--------------------------------------|-------------------------------------------------------------------------------------|
| del Hoyo et al. <sup>31</sup>   |                                                         | Breeding <sup>‡</sup>                                   |                                      |                                                                                     |
| Schulenberg <sup>29</sup>       |                                                         | Sexual behavior <sup>‡</sup>                            |                                      |                                                                                     |
| Skutch <sup>73-75</sup>         | sexual, courtship, pre-copulatory,                      | Courtship <sup>‡</sup>                                  | predominantly during breeding period | specific ( <i>i.e.</i> , display is performed by and/or directed to a specific sex) |
| Wetmore <sup>76,77</sup>        | nuptial, pairing, mating, pair forming ... <sup>†</sup> | Reproduction <sup>‡</sup>                               |                                      |                                                                                     |
| Sick <sup>35</sup>              |                                                         | <i>Cerimônias pré-nupciais, Reprodução</i> <sup>‡</sup> |                                      |                                                                                     |
| Bent <sup>63-72</sup>           |                                                         | Courtship <sup>‡</sup>                                  |                                      |                                                                                     |
| Lislevand et al. <sup>78</sup>  | -                                                       | Display                                                 | -                                    | -                                                                                   |
| <i>Internet Bird Collection</i> | -                                                       | -                                                       | -                                    | intersexual (male to female or female to                                            |

male)<sup>§</sup>

280 \*Function of the display as interpreted by the author. For instance, in the passage “I  
281 saw the courtship flight song of the male [horned lark]”<sup>63</sup> (p. 327), the display’s explicit  
282 function is “courtship” and it was thus taken to be sexual. In the passage “[t]he ‘up-  
283 fluffing’ behavior of the [Yucatan] jays works as a signal of appeasement”<sup>79</sup>, on the  
284 other hand, display’s explicit function is “appeasement”. This display was not  
285 considered to be sexual and thus is irrelevant for data collection purposes.

286 †Ambiguous: same functions but preceded by *apparently, may or may not be, probably ...*

287 ‡Ambiguous: other sections, but sexual function could not be ruled out

288 §Ambiguous: intraspecific, regardless of sex

289

#### 290 *Habitat data*

291 We collected data about habitat structure (for all passerines) and foraging stratum (for  
292 forest passerines only) from Parker et al.<sup>80</sup> and del Hoyo et al.<sup>31</sup>. The question *do*  
293 *individuals occupy primarily open or forest habitats?* was answered *open* (1) if first  
294 (primary) habitat listed for the species in Parker et al.<sup>80</sup> was of type *non-forest* or *aquatic*,  
295 and *forest* (0) if primary habitat was of type *forest* (see Supplementary Methods for  
296 which habitats are classified as non-forest, aquatic and forest by Parker et al.<sup>80</sup>). We  
297 were able to collect habitat data for 2,160 species (88.4% of the species in our initial  
298 sample set) from this source, which only lists birds breeding in the Neotropical region  
299 (*i.e.*, “from northern Mexico to the southern tip of Argentina, including the West  
300 Indies”<sup>80</sup>, p. 120). For the remaining species, we assigned the first habitat listed in  
301 section *Habitat* in del Hoyo et al.<sup>31</sup> to the closest habitat category used by Parker et al.<sup>80</sup>  
302 and determined whether it was a non-forest-, aquatic- or forest-type habitat. In a  
303 random sample of 100 species evaluated from both sources, agreement as to openness  
304 of habitat was very high (97%; posterior mean correlation = 0.97; 95% CI: 0.88 to 1). We  
305 were able to determine primary habitat for 2,436 species (99.8% of the initial sample  
306 set).

307 We searched for information about stratum only for species that occupy forest-  
308 type primary habitats ( $N = 1,864$  species). The question *do individuals forage exclusively*  
309 *in canopy stratum?* was answered *yes* (1) if all foraging strata listed for the species in  
310 Parker et al. (1996) were either *canopy* or *aerial*, and *no* (0) if any other forest stratum  
311 was listed. For species not listed in Parker et al. (1996), we referred to del Hoyo et al.  
312 (2018) using the same criteria (but considering *subcanopy* as *canopy*). We were able to  
313 determine foraging stratum for 1,709 species (91.7% of forest species). Stratum data  
314 were only used in the analysis whose results are shown in the Supplementary  
315 Information.

316

### 317 *Phylogeny*

318 We used species-level Passeriformes trees based on the Hackett backbone from Jetz et  
319 al.<sup>37</sup> (downloaded from <http://birdtree.org> on 18 March 2018). In each analysis, we  
320 pruned trees to match the corresponding species for which we had complete data (*i.e.*,  
321 species with missing data were dropped from the trees). Of the 469 species that were  
322 included in the main analyses, 415 (88.5%) have had their phylogenetic position  
323 determined based on genetic data<sup>37</sup> (Supplementary Data).

324

### 325 *Phylogenetic logistic regressions*

326 We used phylogenetic logistic regressions<sup>38</sup> to test for the influence of primary habitat  
327 structure on the probability of passerines exhibiting aerial display ( $N = 469$  species),  
328 and to test for the influence of foraging stratum on the probability of forest passerines  
329 exhibiting aerial display ( $N = 235$  species; Supplementary Results). In the first analysis,  
330 we compared a model with no predictor variable to one including habitat structure as  
331 a categorical predictor. We fitted each model using the function `phyloglm` from  
332 package `phylolm`<sup>81</sup> (version 2.5) in R<sup>82</sup> (version 3.4.3). To account for phylogenetic

333 uncertainty<sup>83,84</sup>, we fitted each model iteratively using a sample of 1,000 different trees  
334 from Jetz et al.<sup>37</sup>, totalling 2,000 models. We fitted null models manually, and models  
335 predicted by habitat using the package sensiPhy<sup>85</sup> (version 0.8.1). From each of the  
336 2,000 models, we extracted Akaike information criterion (AIC) value as well as the  
337 coefficients' estimates and  $p$ -values. The model with the lowest AIC was selected in  
338 each iteration, as long as the competing model's  $\Delta$ AIC was greater than 2. Estimates  
339 were considered statistically clear if  $p \leq 0.05$ <sup>86</sup>. According to our hypothesis, we  
340 expected that the model containing habitat structure as a predictor would be selected  
341 in most iterations, with a positive slope estimate.

342

#### 343 *Correlated evolution of discrete characters*

344 A different approach to test the hypothesis that aerial displays are more likely to  
345 evolve in open-habitat passerines than forest ones was to use Pagel's<sup>39</sup> method of  
346 detecting correlated evolution between characters. We performed this analysis using  
347 the Discrete module in BayesTraits V3.0.1<sup>40</sup> under a maximum-likelihood (ML)  
348 approach. In order to test our hypothesis with this method, we had to ultimately assess  
349 whether the evolutionary rate of gain of aerial displays is higher in species that live in  
350 open habitats than in species that occupy forests. But a few steps precede this  
351 assessment, and we will get to them below.

352 Pagel's method is based on continuous-time Markov chains with finite state  
353 space (Mk model), which calculates the probability that a trait will change from state  $i$   
354 to state  $j$  over a very (infinitesimally) short time interval<sup>39,87</sup>. This probability is called  
355 instantaneous transition rate and is represented by the parameter  $q_{ij}$ . In this study, we  
356 have two binary characters that, combined, result in four possible states a species may  
357 assume: forest without aerial display, open habitat without aerial display, forest with  
358 aerial display, and open habitat with aerial display. Let us call these states 1 to 4,



359 respectively — because it is the order in which they appear in Figure 2. In this figure,  
360 each arrow corresponds to a parameter  $q$ . By looking at  $q_{12}$ , for example, we are looking  
361 at the probability that a species that does not exhibit aerial display transitions from  
362 forest to open habitat. Note that there are eight possible parameters (eight arrows)  
363 because the diagonals are assumed to be zero; since we are dealing with a very short  
364 time interval, it is assumed that both traits cannot change at the same time.

365         Pagel<sup>39</sup> suggests four biologically plausible models by which two characters can  
366 evolve. If the characters evolve independently (*i.e.*, independent model), the transition  
367 rates in one character do not depend on the state of the other character. In this model,  
368 the transition from forest to open habitat, for example, is assumed to be the same  
369 regardless of whether the species does or does not exhibit aerial display ( $q_{24} = q_{12}$ ).  
370 Likewise, the transition from presence to absence of aerial display is the same  
371 regardless of the species' preference of habitat structure ( $q_{31} = q_{43}$ ). The same holds true  
372 for the remaining two pairs of parameters ( $q_{13} = q_{34}$ ;  $q_{42} = q_{21}$ ). The independent model is  
373 the most parsimonious one, because it has only four free parameters (with the other  
374 four restricted to have the same value as the free ones). Alternatively, if the characters  
375 evolve in a correlated manner (*i.e.*, correlated model), all eight parameters are free to  
376 vary: gain of aerial display depends on habitat ( $q_{12} \neq q_{24}$ ), transition from forest to open  
377 habitat depends on presence of aerial display ( $q_{13} \neq q_{34}$ ), and so on. This is the least  
378 parsimonious model, with eight free parameters. In between the independent and  
379 correlated models, Pagel suggests that one character may influence the evolution of  
380 another, but not the other way around. Thus, if only presence/absence of aerial display  
381 influences preference for habitat structure (*i.e.*, display-dependent model), the  
382 transition rates between habitats should be different depending on whether the species  
383 exhibits or not aerial display ( $q_{12} \neq q_{34}$ ;  $q_{21} \neq q_{43}$ ), but gain and loss of aerial display are  
384 assumed to be the same regardless of the habitat ( $q_{13} = q_{24}$ ;  $q_{31} = q_{42}$ ). Analogously, in the

385 habitat-dependent model, gain and loss of aerial display are different according to the  
386 habitat ( $q_{13} \neq q_{24}$ ;  $q_{31} \neq q_{42}$ ), but transitions between habitats are the same regardless of  
387 aerial display presence ( $q_{12} \neq q_{34}$ ;  $q_{21} \neq q_{43}$ ). Both habitat-dependent and display-  
388 dependent model have six parameters each.

389 We extracted the AIC value of each model using the following equation, where  
390  $k$  is the number of parameters (*i.e.*, number of free  $qs$ ) and  $\hat{L}$  is the maximum  
391 likelihood:

$$392 \quad \text{AIC} = 2k - 2 \ln(\hat{L})$$

393 We also calculated the Akaike weights ( $w_i$ ) of each model to assess the weight  
394 of evidence in its favour relative to all the other models in the set<sup>41,88</sup>. Next, we used a  
395 model-averaging approach to estimate the parameter values. For a given parameter  $q$ ,  
396 we did that by weighting the ML estimate in each of the four models ( $\hat{q}_i$ ) by the  
397 model's  $w_i$ , resulting in the model-averaged ML estimate  $\hat{q}^{41,89}$ :

$$398 \quad \hat{q} = \sum_{i=1}^4 w_i \hat{q}_i$$

399 We decided to use a model-averaging procedure because it offers advantages  
400 such as basing inference not just on the one model estimated to be the best, but on all *a*  
401 *priori* models<sup>89</sup>, and avoiding the need for subjective thresholds to choose which model  
402 is the best<sup>90</sup>. After performing model averaging, we were then able to properly test our  
403 hypothesis by comparing the model-averaged ML estimate of the rate of gain of aerial  
404 display in open habitats ( $q_{24}$ ) and forests ( $q_{13}$ ), predicting that  $q_{24} > q_{13}$ .

405 All steps described above were repeated for each tree in the 1,000-tree sample  
406 from Jetz et al.<sup>37</sup> to account for phylogenetic uncertainty, and the rates shown by the  
407 arrows in Figure 2 are the median model-averaged ML estimate for each transition  
408 rate, multiplied by  $10^2$ , across the 1,000 trees.

409 **Data availability**

410 All of the R code and data used in our analyses will be made available on Dryad upon  
411 acceptance of the paper.

412 **References**

- 413 1. Maynard Smith, J. & Harper, D. *Animal signals*. (Oxford Univ. Press, Oxford,  
414 2004).
- 415 2. Scott-Phillips, T. C. Defining biological communication. *J. Evol. Biol.* **21**, 387–395  
416 (2008).
- 417 3. Cummings, M. E. & Endler, J. A. 25 years of sensory drive: the evidence and its  
418 watery bias. *Curr. Zool.* **64**, 471–484 (2018).
- 419 4. Milinski, M. & Bakker, T. C. M. Female sticklebacks use male coloration in mate  
420 choice and hence avoid parasitized males. *Nature* **344**, 330–333 (1990).
- 421 5. Endler, J. A. Signals, signal conditions, and the direction of evolution. *Am. Nat.*  
422 **139**, S125–S153 (1992).
- 423 6. Boughman, J. W. How sensory drive can promote speciation. *Trends Ecol. Evol.*  
424 **17**, 571–577 (2002).
- 425 7. Ey, E. & Fischer, J. W. The ‘acoustic adaptation hypothesis’ — a review of the  
426 evidence from birds, anurans and mammals. *Bioacoustics* **19**, 21–48 (2009).
- 427 8. Endler, J. A. & Théry, M. Interacting effects of lek placement, display behavior,  
428 ambient light, and color patterns in three Neotropical forest-dwelling birds. *Am.*  
429 *Nat.* **148**, 421–452 (1996).
- 430 9. Uy, J. A. C. & Endler, J. A. Modification of the visual background increases the  
431 conspicuousness of Golden-collared Manakin displays. *Behav. Ecol.* **15**, 1003–  
432 1010 (2004).
- 433 10. Ord, T. J., Peters, R. A., Clucas, B. & Stamps, J. A. Lizards speed up visual

- 434 displays in noisy motion habitats. *Proc. R. Soc. B* **274**, 1057–1062 (2007).
- 435 11. Sicsú, P., Manica, L. T., Maia, R. & Macedo, R. H. Here comes the sun:  
436 multimodal displays are associated with sunlight incidence. *Behav. Ecol.*  
437 *Sociobiol.* **67**, 1633–1642 (2013).
- 438 12. White, T. E., Zeil, J. & Kemp, D. J. Signal design and courtship presentation  
439 coincide for highly biased delivery of an iridescent butterfly mating signal.  
440 *Evolution* **69**, 14–25 (2015).
- 441 13. Klomp, D. A., Stuart-Fox, D., Das, I. & Ord, T. J. Gliding lizards use the position  
442 of the sun to enhance social display. *Biol. Lett.* **13**, 20160979 (2017).
- 443 14. Lewis, C. & Long, T. A. F. Courtship and reproduction in *Carybdea sivickisi*  
444 (Cnidaria: Cubozoa). *Mar. Biol.* **147**, 477–483 (2005).
- 445 15. Land, M. F. The visual control of courtship behaviour in the fly *Poecilobothrus*  
446 *nobilitatus*. *J. Comp. Physiol. A* **173**, 595–603 (1993).
- 447 16. Perez, D. M., Rosenberg, M. S. & Pie, M. R. The evolution of waving displays in  
448 fiddler crabs (*Uca* spp., Crustacea: Ocypodidae). *Biol. J. Linn. Soc.* **106**, 307–315  
449 (2012).
- 450 17. Girard, M. B., Kasumovic, M. M. & Elias, D. O. Multi-modal courtship in the  
451 peacock spider, *Maratus volans* (O.P.-Cambridge, 1874). *PLoS One* **6**, e25390  
452 (2011).
- 453 18. Masonjones, H. D. & Lewis, S. M. Courtship behavior in the dwarf seahorse,  
454 *Hippocampus zosterae*. *Copeia* **3**, 634–640 (1996).
- 455 19. Stamps, J. A. & Barlow, G. W. Variation and stereotypy in the displays of *Anolis*  
456 *aenes* (Sauria: Iguanidae). *Behaviour* **47**, 67–94 (1973).
- 457 20. Lipinski, V. M., Caldart, V. M. & Iop, S. Visual communication in *Hypsiboas*  
458 *curupi* (Anura: Hylidae) at Parque Estadual do Turvo, southern Brazil.  
459 *Phyllomedusa* **11**, 71–74 (2012).

- 460 21. Vliet, K. A. Social displays of the American Alligator (*Alligator mississippiensis*).  
461 *Am. Zool.* **29**, 1019–1031 (1989).
- 462 22. Voigt, C. C., von Helversen, O., Michener, R. & Kunz, T. H. The economics of  
463 harem maintenance in the sac-winged bat, *Saccopteryx bilineata*  
464 (Emballonuridae). *Behav. Ecol. Sociobiol.* **50**, 31–36 (2001).
- 465 23. Székely, T., Reynolds, J. D. & Figuerola, J. Sexual size dimorphism in shorebirds,  
466 gulls, and alcids: the influence of sexual and natural selection. *Evolution* **54**,  
467 1404–1413 (2000).
- 468 24. Ota, N., Gahr, M. & Soma, M. Tap dancing birds: the multimodal mutual  
469 courtship display of males and females in a socially monogamous songbird. *Sci.*  
470 *Rep.* **5**, 16614 (2015).
- 471 25. Andersson, M. B. *Sexual selection*. (Princeton Univ. Press, Princeton, 1994).
- 472 26. Byers, J., Hebets, E. & Podos, J. Female mate choice based upon male motor  
473 performance. *Anim. Behav.* **79**, 771–778 (2010).
- 474 27. Ramos, J. A. & Peters, R. A. Habitat-dependent variation in motion signal  
475 structure between allopatric populations of lizards. *Anim. Behav.* **126**, 69–78  
476 (2017).
- 477 28. Miles, M. C. & Fuxjager, M. J. Synergistic selection regimens drive the evolution  
478 of display complexity in birds of paradise. *J. Anim. Ecol.* **87**, 1149–1159 (2018).
- 479 29. Schulenberg, T. (ed.) *Neotropical Birds Online*. (2018). Available at:  
480 <https://neotropical.birds.cornell.edu/>.
- 481 30. Prum, R. O. Phylogenetic analysis of the evolution of display behavior in the  
482 Neotropical manakins (Aves: Pipridae). *Ethology* **84**, 202–231 (1990).
- 483 31. del Hoyo, J., Elliott, A., Sargatal, J., Christie, D. A. & de Juana, E. *Handbook of the*  
484 *Birds of the World Alive*. (2018). Available at: <https://www.hbw.com/>.
- 485 32. Endler, J. A. The color of light in forests and its implications. *Ecol. Monogr.* **63**, 1–

- 486 27 (1993).
- 487 33. Endler, J. A. On the measurement and classification of color in studies of animal  
488 color patterns. *Biol. J. Linn. Soc.* **41**, 315–352 (1990).
- 489 34. Armstrong, E. A. *Bird display: an introduction to the study of bird psychology*.  
490 (Cambridge Univ. Press, London, 1942).
- 491 35. Sick, H. *Ornitologia brasileira*. (Nova Fronteira, Rio de Janeiro, 1997).
- 492 36. Byers, B. E. & Kroodsma, D. E. in *Handbook of bird biology* (eds. Lovette, I. J. &  
493 Fitzpatrick, J. W.) 355–406 (John Wiley & Sons, Chichester, 2016).
- 494 37. Jetz, W., Thomas, G. H., Joy, J. B., Hartmann, K. & Mooers, A. O. The global  
495 diversity of birds in space and time. *Nature* **491**, 444–8 (2012).
- 496 38. Ives, A. R. & Garland, T., Jr. Phylogenetic logistic regression for binary  
497 dependent variables. *Syst. Biol.* **59**, 9–26 (2010).
- 498 39. Pagel, M. Detecting correlated evolution on phylogenies: a general method for  
499 the comparative analysis of discrete characters. *Proc. R. Soc.* **255**, 37–45 (1994).
- 500 40. Pagel, M., Meade, A. & Barker, D. Bayesian estimation of ancestral character  
501 states on phylogenies. *Syst. Biol.* **53**, 673–684 (2004).
- 502 41. Burnham, K. P. & Anderson, D. R. *Model selection and multimodel inference*.  
503 (Springer-Verlag, New York, 2002).
- 504 42. Stuart-Fox, D. M. & Ord, T. J. Sexual selection, natural selection and the  
505 evolution of dimorphic coloration and ornamentation in agamid lizards. *Proc. R.*  
506 *Soc. B* **271**, 2249–2255 (2004).
- 507 43. Stuart-Fox, D., Moussalli, A. & Whiting, M. J. Natural selection on social signals:  
508 signal efficacy and the evolution of chameleon display coloration. *Am. Nat.* **170**,  
509 916–930 (2007).
- 510 44. Tobias, J. A. *et al.* Song divergence by sensory drive in Amazonian birds.  
511 *Evolution* **64**, 2820–2839 (2010).

- 512 45. Shultz, A. J. & Burns, K. J. Plumage evolution in relation to light environment in  
513 a novel clade of Neotropical tanagers. *Mol. Phylogenet. Evol.* **66**, 112–125 (2013).
- 514 46. Mason, N. A. & Burns, K. J. The effect of habitat and body size on the evolution  
515 of vocal displays in Thraupidae (tanagers), the largest family of songbirds. *Biol.*  
516 *J. Linn. Soc.* **114**, 538–551 (2015).
- 517 47. Derryberry, E. P. *et al.* Ecological drivers of song evolution in birds:  
518 disentangling the effects of habitat and morphology. *Ecol. Evol.* **8**, 1890–1905  
519 (2018).
- 520 48. Fisher, R. A. The evolution of sexual preference. *Eugen. Rev.* **7**, 184–192 (1915).
- 521 49. Lande, R. Models of speciation by sexual selection on polygenic traits. *Proc. Natl.*  
522 *Acad. Sci.* **78**, 3721–3725 (1981).
- 523 50. Kirkpatrick, M. Sexual selection and the evolution of female choice. *Evolution* **36**,  
524 1–12 (1982).
- 525 51. Zahavi, A. Mate selection—a selection for a handicap. *J. Theor. Biol.* **53**, 205–214  
526 (1975).
- 527 52. Zahavi, A. The cost of honesty (further remarks on the handicap principle). *J.*  
528 *Theor. Biol.* **67**, 603–605 (1977).
- 529 53. Endler, J. A. & Basolo, A. L. Sensory ecology, receiver biases and sexual  
530 selection. *Trends Ecol. Evol.* **13**, 415–420 (1998).
- 531 54. Hurd, P. L., Wachtmeister, C.-A. & Enquist, M. Darwin’s principle of antithesis  
532 revisited: a role for perceptual biases in the evolution of intraspecific signals.  
533 *Proc. R. Soc. B* **259**, 201–205 (1995).
- 534 55. Prum, R. O. The Lande-Kirkpatrick mechanism is the null model of evolution by  
535 intersexual selection: implications for meaning, honesty, and design in  
536 intersexual signals. *Evolution* **64**, 3085–3100 (2010).
- 537 56. Hill, G. E. Sexiness, individual condition, and species identity: the information

- 538 signaled by ornaments and assessed by choosing females. *Evol. Biol.* **42**, 251–259  
539 (2015).
- 540 57. Soma, M. & Garamszegi, L. Z. Evolution of courtship display in Estrildid  
541 finches: dance in relation to female song and plumage ornamentation. *Front.*  
542 *Ecol. Evol.* **3**, 4 (2015).
- 543 58. Miles, M. C., Cheng, S. & Fuxjager, M. J. Biogeography predicts macro-  
544 evolutionary patterning of gestural display complexity in a passerine family.  
545 *Evolution* **71**, 1406–1416 (2017).
- 546 59. Muniz, D. G. & Machado, G. Mate sampling influences the intensity of sexual  
547 selection and the evolution of costly sexual ornaments. *J. Theor. Biol.* **447**, 74–83  
548 (2018).
- 549 60. American Ornithologists' Union. *Check-list of North American birds.* (American  
550 Ornithologists' Union, Washington, 1998).
- 551 61. Chesser, R. T. *et al.* Fifty-eighth supplement to the American Ornithological  
552 Society's check-list of North American birds. *Auk* **134**, 751–773 (2017).
- 553 62. Remsen, J. V., Jr. *et al.* A classification of the bird species of South America.  
554 Version 02/06/2018. (2018). Available at:  
555 <http://www.museum.lsu.edu/~Remsen/SACCBaseline.htm>.
- 556 63. Bent, A. C. *Life histories of North American flycatchers, larks, swallows, and their*  
557 *allies.* (Smithsonian Institution, Washington, 1942).
- 558 64. Bent, A. C. *Life histories of North American jays, crows, and titmice.* (Smithsonian  
559 Institution, Washington, 1946).
- 560 65. Bent, A. C. *Life histories of North American nuthatches, wrens, thrashers, and their*  
561 *allies.* (Smithsonian Institution, Washington, 1948).
- 562 66. Bent, A. C. *Life histories of North American thrushes, kinglets, and their allies.*  
563 (Smithsonian Institution, Washington, 1949).



- 564 67. Bent, A. C. *Life histories of North American wagtails, shrikes, vireos, and their allies*.  
565 (Smithsonian Institution, Washington, 1950).
- 566 68. Bent, A. C. *Life histories of North American wood warblers*. (Smithsonian Institution,  
567 Washington, 1953).
- 568 69. Bent, A. C. *Life histories of North American blackbirds, orioles, tanagers, and allies*.  
569 (Smithsonian Institution, Washington, 1958).
- 570 70. Bent, A. C. *Life histories of North American cardinals, grosbeaks, buntings, towhees,*  
571 *finches, sparrows, and allies. Part one*. (Smithsonian Institution, Washington, 1968).
- 572 71. Bent, A. C. *Life histories of North American cardinals, grosbeaks, buntings, towhees,*  
573 *finches, sparrows, and allies. Part two*. (Smithsonian Institution, Washington, 1968).
- 574 72. Bent, A. C. *Life histories of North American cardinals, grosbeaks, buntings, towhees,*  
575 *finches, sparrows, and allies. Part three*. (Smithsonian Institution, Washington,  
576 1968).
- 577 73. Skutch, A. F. *Life histories of Central American birds: families Fringillidae, Thraupidae,*  
578 *Icteridae, Parulidae and Coerebidae*. (Cooper Ornithological Society, Berkeley,  
579 1954).
- 580 74. Skutch, A. F. *Life histories of Central American birds II: families Vireonidae, Sylviidae,*  
581 *Turdidae, Troglodytidae, Paridae, Corvidae, Hirundinidae and Tyrannidae*. (Cooper  
582 Ornithological Society, Berkeley, 1960).
- 583 75. Skutch, A. F. *Life histories of Central American birds III: families Cotingidae, Pipridae,*  
584 *Formicariidae, Furnariidae, Dendrocolaptidae, and Picidae*. (Cooper Ornithological  
585 Society, Berkeley, 1969).
- 586 76. Wetmore, A. *The birds of the Republic of Panamá, Part 3 - Passeriformes:*  
587 *Dendrocolaptidae (woodcreepers) to Oxyruncidae (sharpbills)*. (Smithsonian  
588 Institution, Washington, 1972).
- 589 77. Wetmore, A., Pasquier, R. F. & Olson, S. L. *The birds of the Republic of Panamá,*

- 590           *Part 4 - Passeriformes: Hirundinidae (swallows) to Fringillidae (finches)*. (Smithsonian  
591           Institution, Washington, 1984).
- 592   78.   Lislevand, T., Figuerola, J. & Székely, T. Avian body sizes in relation to  
593           fecundity, mating system, display behavior, and resource sharing. *Ecology* **88**,  
594           1605 (2007).
- 595   79.   Duvall, A. Yucatan jay (*Cyanocorax yucatanicus*), version 1.0. Available at:  
596           <https://neotropical.birds.cornell.edu/Species-Account/nb/species/yucjay1/>.
- 597   80.   Parker, T. A., III, Stotz, D. F. & Fitzpatrick, J. W. in *Neotropical birds: ecology and*  
598           *conservation* (eds. Stotz, D. F., Fitzpatrick, J. W., Parker, T. A., III & Moskovitz, D.  
599           K.) 115–436 (Univ. of Chicago Press, Chicago, 1996).
- 600   81.   Ho, L. S. T. & Ané, C. A linear-time algorithm for Gaussian and non-Gaussian  
601           trait evolution models. *Syst. Biol.* **63**, 397–408 (2014).
- 602   82.   R Core Team. R: a language and environment for statistical computing. (2017).  
603           Available at: <https://www.r-project.org/>.
- 604   83.   Donoghue, M. J. & Ackerly, D. D. Phylogenetic uncertainties and sensitivity  
605           analyses in comparative biology. *Philos. Trans. R. Soc. B* **351**, 1241–1249 (1996).
- 606   84.   Rubolini, D., Liker, A., Garamszegi, L. Z., Møller, A. P. & Saino, N. Using the  
607           BirdTree.org website to obtain robust phylogenies for avian comparative  
608           studies: a primer. *Curr. Zool.* **61**, 959–965 (2015).
- 609   85.   Paterno, G. B., Penone, C. & Werner, G. D. A. sensiPhy: an r-package for  
610           sensitivity analysis in phylogenetic comparative methods. *Methods Ecol. Evol.* **9**,  
611           1461–1467 (2018).
- 612   86.   Dushoff, J., Kain, M. P. & Bolker, B. M. I can see clearly now: reinterpreting  
613           statistical significance. *arXiv* 1810.06387v1 (2018).
- 614   87.   O’Meara, B. C. Evolutionary inferences from phylogenies: a review of methods.  
615           *Annu. Rev. Ecol. Evol. Syst.* **43**, 267–285 (2012).

- 616 88. Harmon, L. J., Weir, J. T., Brock, C. D., Glor, R. E. & Challenger, W. GEIGER:  
617 investigating evolutionary radiations. *Bioinformatics* **24**, 129–131 (2008).
- 618 89. Burnham, K. P., Anderson, D. R. & Huyvaert, K. P. AIC model selection and  
619 multimodel inference in behavioral ecology: some background, observations,  
620 and comparisons. *Behav. Ecol. Sociobiol.* **65**, 23–35 (2011).
- 621 90. Caetano, D. S., O’Meara, B. C. & Beaulieu, J. M. Hidden state models improve  
622 state-dependent diversification approaches, including biogeographical models.  
623 *Evolution* **72**, 2308–2324 (2018).

## 624 **Acknowledgments**

625 We thank R. Maia and L. Manica for critical input throughout the development of the  
626 project; D. Caetano and D. Muniz for comments and suggestions on earlier drafts of  
627 the manuscript; D. Caetano, A. Meade, G. Burin, and C. Botero for help with analyses;  
628 P. Guimarães Jr. for help with data collection; J. Quental, K. Chamberlain and K. Hay  
629 for permission to use photos (and G. Smith for licensing under CC). Lastly, we thank  
630 the many naturalists and ornithologists out in the field watching birds as they dance;  
631 their observations are the basis of this study. This study was financed in part by the  
632 Coordenação de Aperfeiçoamento de Pessoal de Nível Superior – Brasil (CAPES) –  
633 Finance Code 001.

## 634 **Competing interests**

635 The authors declare no competing interests.
